# Supplementary material for: 7,8-DHF Treatment Induces Cyr61 Expression to Suppress Hypoxia Induced ER Stress in HK-2 Cells
Source: Hindawi journal article supplement (doi:10.1155/2016/5029797), 2016-01-01
Supplement: f1 [file 5029797.f1.zip]

Archive with 14 entries (14 files):
- Supplementary Materials/Figure S1(20161210)_BMRI_1822116.pptx
- Supplementary Materials/Figure S1(a-TUBLIN).tif
- Supplementary Materials/Figure S1(TrkB).tif
- Supplementary Materials/Figure S2(AKT).tif
- Supplementary Materials/Figure S2(b-actin).tif
- Supplementary Materials/Figure S2(Cyr61).tif
- Supplementary Materials/Figure S2(p-AKT).tif
- Supplementary Materials/Figure S2_BMRI_1822117.pptx
- Supplementary Materials/mat.5029797.v1.xlsx
- Supplementary Materials/S1_BMRI_1815263.pdf
- Supplementary Materials/S2_BMRI_1815264.pdf
- Supplementary Materials/supplementary_BMRI_1822109.docx
- Supplementary Materials/supplementary20161130_BMRI_1815267.docx
- Supplementary Materials/supplementary20161130_BMRI_1815268.pdf
