# Supplementary material for: 7,8-DHF Treatment Induces Cyr61 Expression to Suppress Hypoxia Induced ER Stress in HK-2 Cells
Source: Hindawi journal article supplement (doi:10.1155/2016/5029797), 2016-01-01
Supplement: f1 [file 5029797.f1.zip › Supplementary Materials/mat.5029797.v1.xlsx]

## Sheet: Sheet1
Primers for real-time PCR
Gene	Primer Sequence(5’ to 3’)
GRP78	Forward	GAGAAGTGCGGTGCTGAT
	Reverse	AGGAGTGAAGGCGACATA
CHOP	Forward	TAAAGATGAGCGGGTGGCAG
	Reverse	TGCCATCTCTGCAGTTGGAT
PERK	Forward	ATGAGACAGAGTTGCGACCG
	Reverse	TGGATGACACCAAGGAACCG
eIF2α	Forward	AGAGTTTCTCCAGAGGAAGCA
	Reverse	CAGCTGCTCATCCTTGGTGT
ATF4	Forward	TCAGTCCCTCCAACAACAGC
	Reverse	TCTGGCATGGTTTCCAGGTC
IRE1α	Forward	GCGAAGCATGTGCTCAAACA
	Reverse	GGCCATCCAGGGATTCCTTT
XBP1U	Forward	TGAGTGAGCTGGAACAGCAA
	Reverse	AGCGCTGTCTTAACTCCTGG
XBP1S	Forward	CTGAGTCCGCAGCAGGT
	Reverse	GTCCAGAATGCCCAACAGGA
ATF6	Forward	CCTAGTGTGAGCCCTGCAAA
	Reverse	TCAGTTAGCACCATCAGGGC
Cyr61	Forward	GCAGTTGGAAAAGGCAGCTC
	Reverse	ACAGGTCTTTGAGCACTGGG
GAPDH	Forward	TCGACAGTCAGCCGCATCTT
	Reverse	GAGTTAAAAGCAGCCCTGGTG
