# Supplementary material for: 7,8-DHF Treatment Induces Cyr61 Expression to Suppress Hypoxia Induced ER Stress in HK-2 Cells
Source: Hindawi journal article supplement (doi:10.1155/2016/5029797), 2016-01-01
Supplement: f1 [file 5029797.f1.zip › Supplementary Materials/supplementary20161130_BMRI_1815267.docx]

Figure legend

Figure S1.

Expression of TrkB in HK-2 cells.

Figure S2.

Treatment of 7,8-DHF up-regulated protein level of p-AKT and Cyr61 which could be blocked by PI3K/AKT inhibitor LY294002 in HK-2 cells damaged by hypoxia 12 h. Data were presented as the mean ± SD (n = 5 per group). *, ** or *** indicates P < 0.05, 0.01 or 0.001 for comparison between hypoxia + DMSO treatment. &, && or &&& indicates P<0.05, 0.01 or 0.001 for comparison between  hypoxia + 7,8-DHF (100 μM） or hypoxia + 7,8-DHF + LY294002（50 μM）.
