# Supplementary figures and images for: 7,8-DHF Treatment Induces Cyr61 Expression to Suppress Hypoxia Induced ER Stress in HK-2 Cells
Source: Hindawi journal article supplement (doi:10.1155/2016/5029797), 2016-01-01

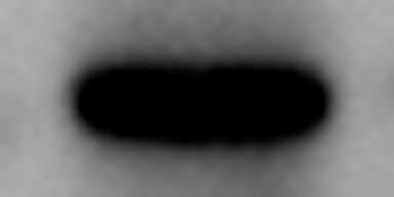

Supplement: f1 [file 5029797.f1.zip › Supplementary Materials/Figure S1(a-TUBLIN).tif]

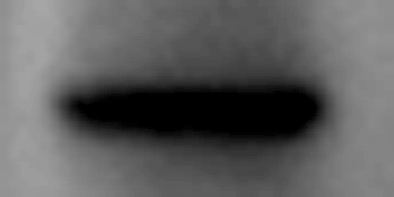

Supplement: f1 [file 5029797.f1.zip › Supplementary Materials/Figure S1(TrkB).tif]

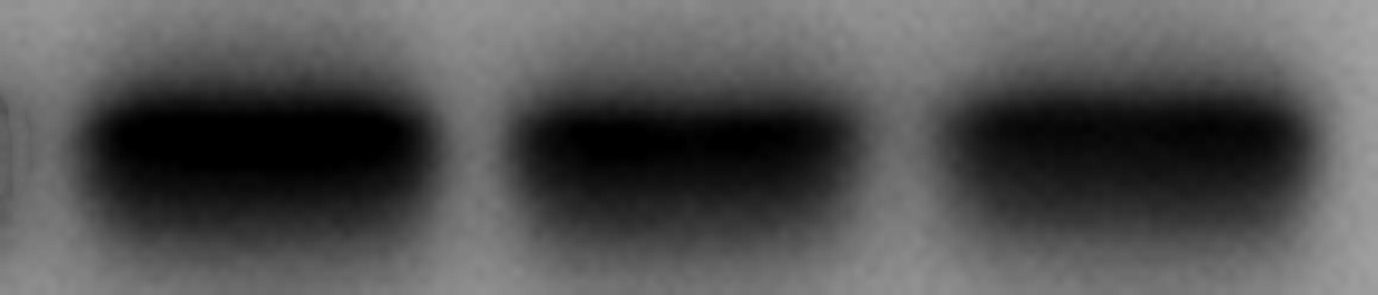

Supplement: f1 [file 5029797.f1.zip › Supplementary Materials/Figure S2(AKT).tif]

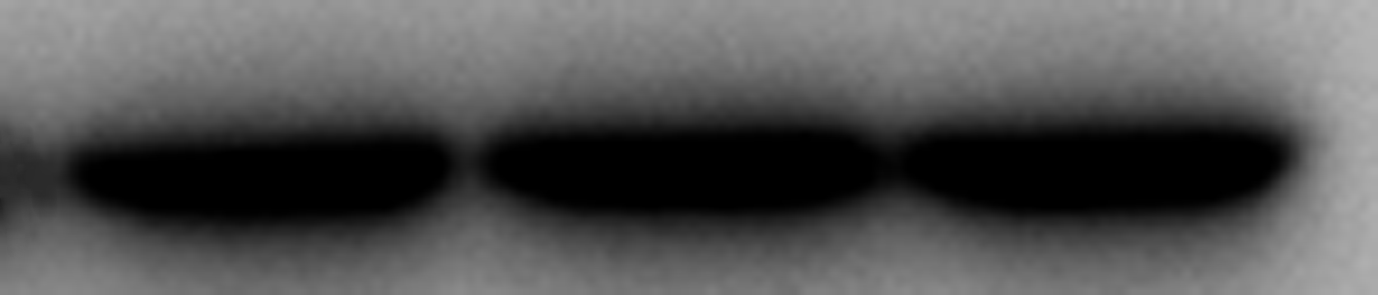

Supplement: f1 [file 5029797.f1.zip › Supplementary Materials/Figure S2(b-actin).tif]

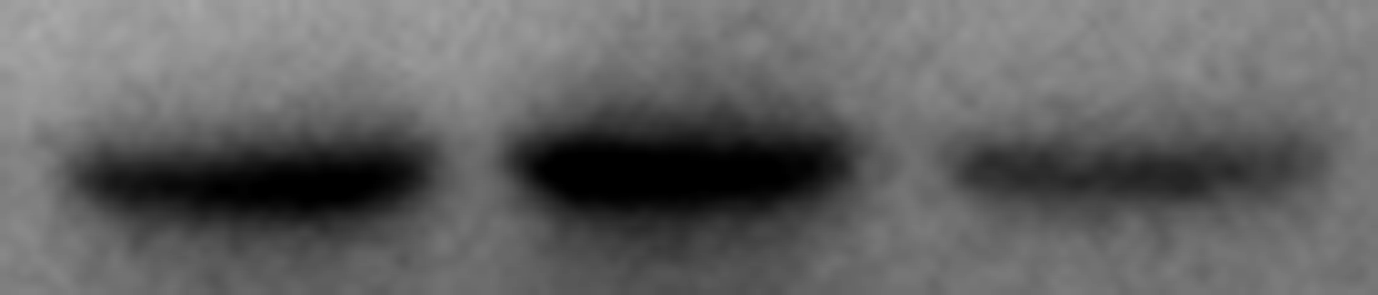

Supplement: f1 [file 5029797.f1.zip › Supplementary Materials/Figure S2(Cyr61).tif]

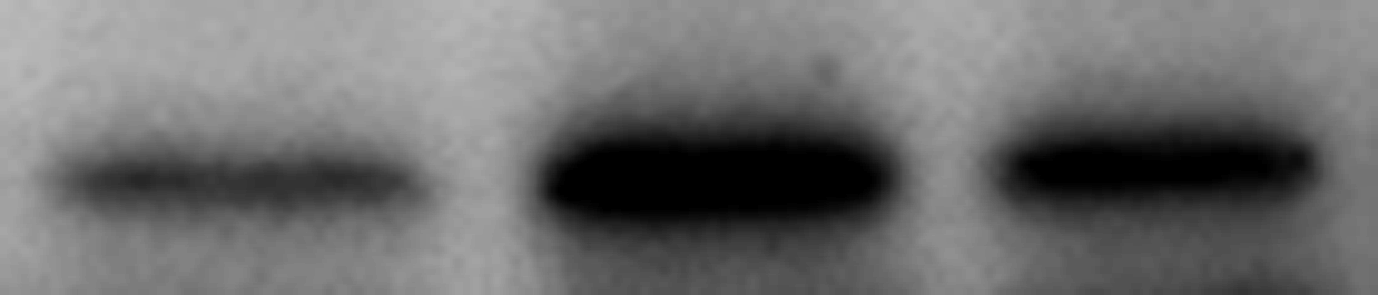

Supplement: f1 [file 5029797.f1.zip › Supplementary Materials/Figure S2(p-AKT).tif]

TrkB

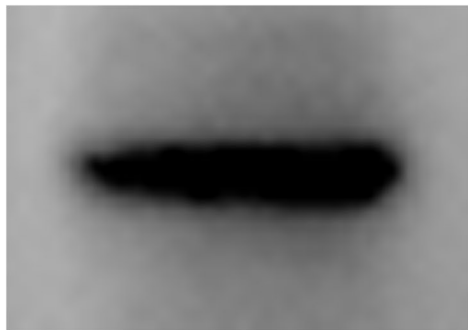

140kDa

$\beta$ -tubulin

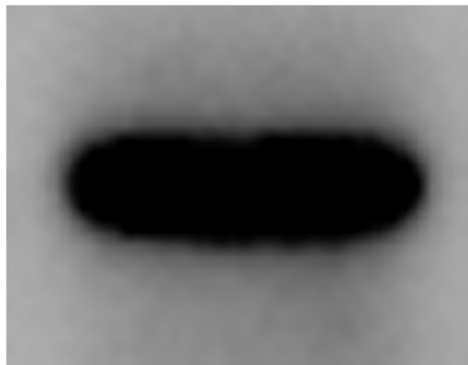

55kDa

Supplement: f1 [file 5029797.f1.zip › Supplementary Materials/S1_BMRI_1815263.pdf]

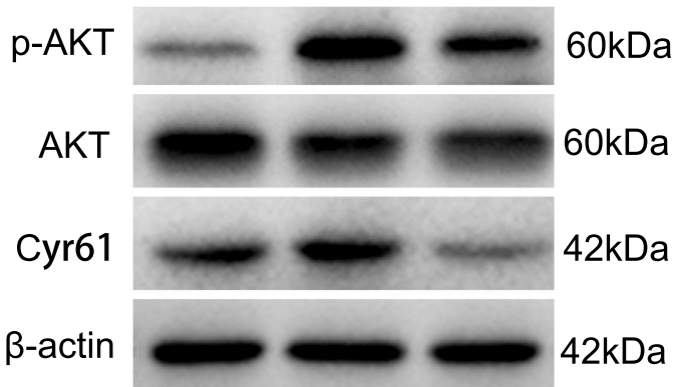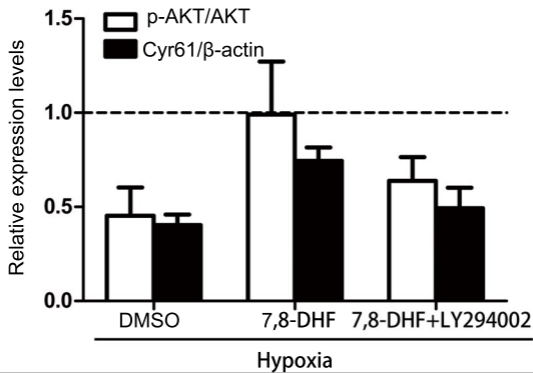

Supplement: f1 [file 5029797.f1.zip › Supplementary Materials/S2_BMRI_1815264.pdf]
